# Supplementary material for: In Vitro Activity of Cefepime-Taniborbactam and Comparators against Clinical Isolates of Gram-Negative Bacilli from 2018 to 2020: Results from the Global Evaluation of Antimicrobial Resistance via Surveillance (GEARS) Program
Source: PubMed Central journal article supplement (PMC9872668; doi:10.1128/aac.01281-22), 2022-12-21
Supplement: aac.01281-22-s0001.pdf [file aac.01281-22-s0001.pdf]

## SUPPLEMENTARY DATA

**TABLE S1** *In vitro* activity of cefepime-taniborbactam and comparator agents against 13,731 isolates of Enterobacterales

| Antimicrobial agent                 | MIC, µg/ml        |                   |              | MIC interpretation |                 |             |
|-------------------------------------|-------------------|-------------------|--------------|--------------------|-----------------|-------------|
|                                     | MIC <sub>50</sub> | MIC <sub>90</sub> | MIC range    | % susceptible      | % intermediate  | % resistant |
| Cefepime-taniborbactam <sup>a</sup> | 0.06              | 0.25              | ≤0.008 - >16 | 99.7               | NA <sup>b</sup> | 0.3         |
| Cefepime                            | ≤0.25             | >16               | ≤0.25 - >16  | 77.3               | NA              | 17.4        |
| Ceftazidime-avibactam               | ≤0.12             | 0.5               | ≤0.12 - >16  | 97.8               | NA              | 2.2         |
| Ceftazidime                         | 0.5               | >16               | ≤0.03 - >16  | 74.2               | 2.3             | 23.4        |
| Ceftolozane-tazobactam              | 0.5               | 8                 | ≤0.25 - >8   | 87.1               | 2.4             | 10.5        |
| Gentamicin                          | 0.5               | >16               | ≤0.12 - >16  | 83.8               | 0.8             | 15.4        |
| Levofloxacin                        | 0.12              | >8                | ≤0.004 - >8  | 69.8               | 4.2             | 26.0        |
| Meropenem-vaborbactam               | ≤0.06             | 0.12              | ≤0.06 - >16  | 97.4               | 0.3             | 2.2         |
| Meropenem                           | 0.03              | 0.12              | ≤0.004 - >64 | 94.8               | 0.6             | 4.6         |
| Piperacillin-tazobactam             | ≤4                | 128               | ≤4 - >128    | 84.2               | 4.9             | 10.9        |

<sup>a</sup> For comparative purposes only, % susceptible and % resistant for cefepime-taniborbactam correspond to % of isolates inhibited at ≤16 µg/ml and ≥32 µg/ml, respectively.

<sup>b</sup> NA, not applicable.

**TABLE S2** *In vitro* activity of cefepime-taniborbactam and cefepime against individual species of Enterobacterales

| Species <sup>a</sup> (no. of isolates)      | Antimicrobial agent                 | MIC, µg/ml        |                   |              | MIC interpretation |                 |             |
|---------------------------------------------|-------------------------------------|-------------------|-------------------|--------------|--------------------|-----------------|-------------|
|                                             |                                     | MIC <sub>50</sub> | MIC <sub>90</sub> | MIC range    | % susceptible      | % intermediate  | % resistant |
| <i>Citrobacter freundii</i> complex (1,126) | Cefepime-taniborbactam <sup>b</sup> | 0.03              | 0.12              | ≤0.008 - >16 | 99.9               | NA <sup>c</sup> | 0.1         |
|                                             | Cefepime                            | ≤0.25             | 2                 | ≤0.25 - >16  | 93.3               | 1.9             | 4.9         |
| <i>Enterobacter cloacae</i> complex (797)   | Cefepime-taniborbactam              | 0.06              | 0.5               | ≤0.008 - >16 | 99.9               | NA              | 0.1         |
|                                             | Cefepime                            | ≤0.25             | 16                | ≤0.25 - >16  | 78.3               | 10.3            | 11.4        |
| <i>Escherichia coli</i> (4,041)             | Cefepime-taniborbactam              | 0.03              | 0.12              | ≤0.008 - >16 | 99.7               | NA              | 0.3         |
|                                             | Cefepime                            | ≤0.25             | >16               | ≤0.25 - >16  | 74.3               | 7.4             | 18.3        |
| <i>Klebsiella aerogenes</i> (390)           | Cefepime-taniborbactam              | 0.06              | 0.12              | 0.016 - 4    | 100                | NA              | 0           |
|                                             | Cefepime                            | ≤0.25             | 0.5               | ≤0.25 - >16  | 96.2               | 2.6             | 1.3         |
| <i>Klebsiella oxytoca</i> (759)             | Cefepime-taniborbactam              | 0.03              | 0.06              | ≤0.008 - 4   | 100                | NA              | 0           |
|                                             | Cefepime                            | ≤0.25             | 1                 | ≤0.25 - >16  | 94.5               | 3.6             | 2.0         |
| <i>Klebsiella pneumoniae</i> (4,024)        | Cefepime-taniborbactam              | 0.06              | 1                 | ≤0.008 - >16 | 99.5               | NA              | 0.5         |
|                                             | Cefepime                            | ≤0.25             | >16               | ≤0.25 - >16  | 62.0               | 5.1             | 33.0        |
| <i>Morganella morganii</i> (389)            | Cefepime-taniborbactam              | 0.03              | 0.12              | ≤0.008 - 1   | 100                | NA              | 0           |
|                                             | Cefepime                            | ≤0.25             | ≤0.25             | ≤0.25 - >16  | 96.7               | 1.5             | 1.8         |
| <i>Proteus mirabilis</i> (758)              | Cefepime-taniborbactam              | 0.06              | 0.25              | ≤0.008 - 8   | 100                | NA              | 0           |
|                                             | Cefepime                            | ≤0.25             | 16                | ≤0.25 - >16  | 84.8               | 4.8             | 10.4        |
| <i>Proteus vulgaris</i> (358)               | Cefepime-taniborbactam              | 0.06              | 0.06              | 0.016 - 8    | 100                | NA              | 0           |
|                                             | Cefepime                            | ≤0.25             | ≤0.25             | ≤0.25 - >16  | 98.6               | 0.8             | 0.6         |
| <i>Providencia rettgeri</i> (164)           | Cefepime-taniborbactam              | 0.016             | 0.12              | ≤0.008 - >16 | 98.2               | NA              | 1.8         |
|                                             | Cefepime                            | ≤0.25             | 0.5               | ≤0.25 - >16  | 92.7               | 3.1             | 4.3         |
| <i>Providencia stuartii</i> (213)           | Cefepime-taniborbactam              | 0.06              | 0.12              | 0.016 - 2    | 100                | NA              | 0           |
|                                             | Cefepime                            | ≤0.25             | 8                 | ≤0.25 - >16  | 82.6               | 8.0             | 9.4         |
| <i>Serratia liquefaciens</i> (58)           | Cefepime-taniborbactam              | 0.06              | 0.12              | ≤0.008 - 0.5 | 100                | NA              | 0           |
|                                             | Cefepime                            | ≤0.25             | ≤0.25             | ≤0.25 - 0.5  | 100                | 0               | 0           |

|                                  |                        |       |      |             |      |     |     |
|----------------------------------|------------------------|-------|------|-------------|------|-----|-----|
| <i>Serratia marcescens</i> (530) | Cefepime-taniborbactam | 0.06  | 0.25 | 0.016 - >16 | 99.6 | NA  | 0.4 |
|                                  | Cefepime               | ≤0.25 | 2    | ≤0.25 - >16 | 90.4 | 1.3 | 8.3 |

<sup>a</sup> Species/groups listed were limited to those with 50 or more isolates tested.

<sup>b</sup> For comparative purposes only, % susceptible and % resistant for cefepime-taniborbactam correspond to % of isolates inhibited at ≤16 µg/ml and ≥32 µg/ml, respectively.

<sup>c</sup> NA, not applicable.

**TABLE S3** Cefepime-taniboractam MIC distribution for 627 isolates of carbapenemase-positive Enterobacterales<sup>a</sup> stratified by carbapenemase type and susceptibility to cefepime

|                               |                    | Cefepime-taniboractam MIC, µg/ml (% of isolates at MIC) |          |           |           |           |           |           |           |           |           |           |                  |
|-------------------------------|--------------------|---------------------------------------------------------|----------|-----------|-----------|-----------|-----------|-----------|-----------|-----------|-----------|-----------|------------------|
|                               |                    | 0.03                                                    | 0.06     | 0.12      | 0.25      | 0.5       | 1         | 2         | 4         | 8         | 16        | ≥32       | Total            |
| Carbapenemase                 | KPC                | 9 (75.0)                                                | 27 (100) | 33 (68.8) | 34 (51.5) | 29 (32.2) | 40 (32.3) | 31 (29.5) | 16 (25.8) | 9 (27.3)  | 0 (0)     | 0 (0)     | 228              |
|                               | NDM                | 0 (0)                                                   | 0 (0)    | 4 (8.3)   | 11 (16.7) | 45 (50.0) | 43 (34.7) | 29 (27.6) | 7 (11.3)  | 15 (45.5) | 25 (89.3) | 28 (93.3) | 207              |
|                               | OXA-48-like        | 2 (16.7)                                                | 0 (0)    | 10 (20.8) | 18 (27.3) | 12 (13.3) | 33 (26.6) | 44 (41.9) | 38 (61.3) | 8 (24.2)  | 1 (3.6)   | 2 (6.6)   | 168              |
|                               | VIM                | 1 (8.3)                                                 | 0 (0)    | 1 (2.1)   | 3 (4.5)   | 4 (4.4)   | 8 (6.5)   | 1 (1.0)   | 1 (1.6)   | 1 (4.2)   | 2 (7.1)   | 0 (0)     | 22               |
|                               | Total              | 12 (100)                                                | 27 (100) | 48 (100)  | 66 (100)  | 90 (100)  | 124 (100) | 105 (100) | 62 (100)  | 33 (100)  | 28 (100)  | 30 (100)  | 625 <sup>b</sup> |
| Cum. % inhibited <sup>c</sup> |                    | 1.9                                                     | 6.2      | 13.9      | 24.5      | 38.9      | 58.7      | 75.5      | 85.4      | 90.7      | 95.2      | 100       |                  |
| Cefepime                      | MIC <sub>50</sub>  | 8                                                       | 16       | ≥32       | ≥32       | ≥32       | ≥32       | ≥32       | ≥32       | ≥32       | ≥32       | ≥32       |                  |
|                               | MIC <sub>90</sub>  | ≥32                                                     | ≥32      | ≥32       | ≥32       | ≥32       | ≥32       | ≥32       | ≥32       | ≥32       | ≥32       | ≥32       |                  |
|                               | % susceptible      | 33.3                                                    | 7.4      | 6.3       | 9.1       | 3.3       | 0.8       | 0         | 0         | 0         | 0         | 0         |                  |
|                               | % SDD <sup>d</sup> | 41.7                                                    | 22.2     | 14.6      | 4.5       | 2.2       | 0.8       | 1.0       | 0         | 0         | 0         | 0         |                  |
|                               | % resistant        | 25.0                                                    | 70.4     | 79.2      | 86.4      | 94.4      | 98.4      | 99.0      | 100       | 100       | 100       | 100       |                  |

<sup>a</sup> IMP-positive isolates ( $n=6$ ) were excluded from the dataset as IMP is outside the spectrum of taniboractam inhibition.

<sup>b</sup> Two isolates tested with cefepime-taniboractam MICs of 0.016 µg/ml (2 KPC-positive isolates); these isolates were excluded from the table.

<sup>c</sup> Cumulative % of all carbapenemase-positive isolates inhibited at cefepime-taniboractam MIC.

<sup>d</sup> SDD, susceptible-dose dependent.

**TABLE S4.** *In vitro* activity of cefepime-taniborbactam and comparator agents against 4,619 isolates of *P. aeruginosa*

| Antimicrobial agent                 | MIC, µg/ml        |                   |             | MIC interpretation |                 |             |
|-------------------------------------|-------------------|-------------------|-------------|--------------------|-----------------|-------------|
|                                     | MIC <sub>50</sub> | MIC <sub>90</sub> | MIC range   | % susceptible      | % intermediate  | % resistant |
| Cefepime-taniborbactam <sup>a</sup> | 2                 | 8                 | ≤0.06 - >32 | 97.4               | NA <sup>b</sup> | 2.6         |
| Cefepime                            | 4                 | 32                | ≤0.25 - >32 | 79.4               | 9.0             | 11.7        |
| Ceftazidime-avibactam               | 2                 | 8                 | ≤0.25 - >16 | 90.5               | NA              | 9.6         |
| Ceftazidime                         | 4                 | >32               | ≤0.25 - >32 | 76.9               | 4.7             | 18.4        |
| Ceftolozane-tazobactam              | 1                 | 8                 | ≤0.12 - >16 | 88.8               | 2.6             | 8.7         |
| Ciprofloxacin                       | 0.12              | >4                | ≤0.06 - >4  | 74.7               | 4.1             | 21.2        |
| Gentamicin                          | 2                 | >16               | ≤0.25 - >16 | 83.7               | 4.1             | 12.2        |
| Imipenem                            | 2                 | >8                | ≤0.5 - >8   | 53.8               | 15.5            | 30.6        |
| Meropenem-vaborbactam <sup>c</sup>  | 0.5               | 16                | ≤0.06 - >16 | 86.6               | NA              | 13.4        |
| Meropenem                           | 0.5               | >8                | ≤0.06 - >8  | 73.5               | 5.9             | 20.5        |
| Piperacillin-tazobactam             | 8                 | >128              | ≤0.5 - >128 | 70.8               | 14.2            | 15.0        |

<sup>a</sup> For comparative purposes only, % susceptible and % resistant for cefepime-taniborbactam correspond to % of isolates inhibited at ≤16 µg/ml and ≥32 µg/ml, respectively.

<sup>b</sup> NA, not applicable.

<sup>c</sup> Meropenem-vaborbactam MICs for *P. aeruginosa* were interpreted using EUCAST breakpoints (≤8 µg/ml, susceptible; >8 µg/ml, resistant) (EUCAST v11, 2021) because CLSI has not published breakpoints for this agent-organism combination.

**TABLE S5** Cefepime-taniboractam MIC distribution for 216 isolates of carbapenemase-positive *P. aeruginosa*<sup>a</sup> stratified by carbapenemase type and susceptibility to cefepime

|                               |                   | Cefepime-taniboractam MIC, µg/ml (% of isolates at MIC) |           |           |          |           | Total |
|-------------------------------|-------------------|---------------------------------------------------------|-----------|-----------|----------|-----------|-------|
|                               |                   | ≤4                                                      | 8         | 16        | 32       | ≥64       |       |
| Carbapenemase                 | VIM               | 38 (84.4)                                               | 82 (77.4) | 19 (73.1) | 5 (55.6) | 15 (50.0) | 159   |
|                               | GES               | 7 (15.5)                                                | 21 (19.8) | 5 (19.2)  | 0 (0)    | 0 (0)     | 33    |
|                               | NDM               | 0 (0)                                                   | 0 (0)     | 0 (0)     | 3 (33.3) | 14 (46.7) | 17    |
|                               | KPC               | 0 (0)                                                   | 3 (2.8)   | 2 (7.7)   | 1 (11.1) | 1 (3.3)   | 7     |
|                               | Total             | 45 (100)                                                | 106 (100) | 26 (100)  | 9 (100)  | 30 (100)  | 216   |
| Cum. % inhibited <sup>b</sup> |                   | 20.8                                                    | 69.9      | 81.9      | 86.1     | 100       |       |
| Cefepime                      | MIC <sub>50</sub> | 16                                                      | ≥32       | ≥32       | ≥32      | ≥32       |       |
|                               | MIC <sub>90</sub> | ≥32                                                     | ≥32       | ≥32       | ≥32      | ≥32       |       |
|                               | % susceptible     | 20.0                                                    | 16.0      | 0         | 0        | 0         |       |
|                               | % intermediate    | 40.0                                                    | 30.2      | 19.2      | 0        | 0         |       |
|                               | % resistant       | 40.0                                                    | 53.8      | 80.8      | 100      | 100       |       |

<sup>a</sup> IMP-positive isolates ( $n=33$ ) were excluded from the dataset as IMP is outside the spectrum of taniboractam inhibition.

<sup>b</sup> Cumulative % of all carbapenemase-positive isolates inhibited at cefepime-taniboractam MIC.

**TABLE S6** Total isolate counts by group/species of Enterobacterales

| Group/Species                                    | Total isolates (% of total) |
|--------------------------------------------------|-----------------------------|
| <i>Citrobacter freundii</i> complex <sup>a</sup> | 1,126 (8.2)                 |
| <i>Enterobacter cloacae</i> complex <sup>b</sup> | 797 (5.8)                   |
| <i>Escherichia coli</i>                          | 4,041 (29.4)                |
| <i>Klebsiella aerogenes</i>                      | 390 (2.8)                   |
| <i>Klebsiella oxytoca</i>                        | 759 (5.5)                   |
| <i>Klebsiella pneumoniae</i>                     | 4,024 (29.3)                |
| <i>Klebsiella variicola</i>                      | 4 (<0.1)                    |
| <i>Morganella morganii</i>                       | 389 (2.8)                   |
| <i>Proteus mirabilis</i>                         | 758 (5.5)                   |
| <i>Proteus vulgaris</i>                          | 358 (2.6)                   |
| <i>Providencia alcalifaciens</i>                 | 3 (<0.1)                    |
| <i>Providencia rettgeri</i>                      | 164 (1.2)                   |
| <i>Providencia</i> sp.                           | 2 (<0.1)                    |
| <i>Providencia stuartii</i>                      | 213 (1.6)                   |
| <i>Serratia fonticola</i>                        | 1 (<0.1)                    |
| <i>Serratia liquefaciens</i>                     | 58 (0.4)                    |
| <i>Serratia marcescens</i>                       | 530 (3.9)                   |
| <i>Serratia odorifera</i>                        | 2 (<0.1)                    |
| <i>Serratia rubidaea</i>                         | 5 (<0.1)                    |
| <i>Serratia</i> sp.                              | 83 (0.6)                    |
| <i>Serratia ureilytica</i>                       | 24 (0.2)                    |
| <b>Total</b>                                     | <b>13,731 (100)</b>         |

<sup>a</sup> *Citrobacter freundii* complex isolates consisted of: 681 *Citrobacter freundii*, 374 *Citrobacter koseri*, 53 *Citrobacter braakii*, 7 *Citrobacter amalonaticus*, 4 *Citrobacter farmeri*, 4 *Citrobacter* sp., 2 *Citrobacter sedlakii*, and 1 *Citrobacter youngae*.

<sup>b</sup> *Enterobacter cloacae* complex isolates consisted of: 586 *Enterobacter cloacae*, 54 *Enterobacter asburiae*, 27 *Enterobacter bugandensis*, 24 *Enterobacter xiangfangensis*, 23 *Enterobacter* sp., 17 *Enterobacter kobei*, 8 *Enterobacter ludwigii*, and 58 *Enterobacter cloacae* complex, unable to further speciate.

**TABLE S7** Total isolate counts of Enterobacterales and *P. aeruginosa* by global region of origin

| Region of origin | Enterobacterales (% of total isolates) | <i>P. aeruginosa</i> (% of total isolates) |
|------------------|----------------------------------------|--------------------------------------------|
| Africa           | 428 (3.1)                              | 183 (4.0)                                  |
| Asia             | 1,289 (9.4)                            | 363 (7.9)                                  |
| Europe           | 5,809 (42.3)                           | 2,035 (44.1)                               |
| Latin America    | 1,534 (11.2)                           | 573 (12.4)                                 |
| Middle East      | 464 (3.4)                              | 271 (5.9)                                  |
| North America    | 3,873 (28.2)                           | 1,044 (22.6)                               |
| South Pacific    | 334 (2.4)                              | 150 (3.2)                                  |
| Total            | 13,731 (100)                           | 4,619 (100)                                |



### **ADDITIONAL STUDY S1** *ftsI* (PBP3) analysis

To better understand the association between PBP3 sequence mutations and cefepime-taniborbactam MICs, additional isolates of *E. coli* ( $n=92$ ) and *P. aeruginosa* ( $n=299$ ) with MICs  $\leq 16$   $\mu\text{g/ml}$  (*E. coli*, MIC range, 0.03–16  $\mu\text{g/ml}$ ; *P. aeruginosa*, MIC range, 0.25–16  $\mu\text{g/ml}$ ) were chosen from study isolates for *ftsI* gene PCR amplification/Sanger sequencing or WGS. For *E. coli*, 27 of the 92 isolates (29.3%) with cefepime-taniborbactam MICs  $\leq 16$   $\mu\text{g/ml}$  exhibited either a YRIN or YRIK insertion at position 333 in PBP3. In comparison, 73.7% (28/38) of all *E. coli* isolates identified in the main study with one of these four amino acid insertions in PBP3 had a cefepime-taniborbactam MIC of  $\leq 16$   $\mu\text{g/ml}$ . In the main study, 10 isolates tested with cefepime-taniborbactam MICs  $>16$   $\mu\text{g/ml}$ , 11 isolates tested with cefepime-taniborbactam MICs of 16  $\mu\text{g/ml}$ , and 17 isolates tested with cefepime-taniborbactam MICs  $\leq 8$   $\mu\text{g/ml}$ . Therefore, it appears that such an insertion alone is insufficient to consistently elevate cefepime-taniborbactam MICs above 8  $\mu\text{g/ml}$ . However, this mutation in combination with an acquired  $\beta$ -lactamase, particularly NDM, may be sufficient to significantly increase the cefepime-taniborbactam MIC, as 17 of the 21 isolates with this PBP3 insertion, that tested with a cefepime-taniborbactam MIC of  $\geq 16$   $\mu\text{g/ml}$ , also harbored NDM. For *P. aeruginosa*, PBP3 amino acid variants previously shown to have an effect on  $\beta$ -lactam activity (G63D, G216S, A244T, R504C, I524T, P527S, G531D, F533L) were not observed in any of the isolates tested with cefepime-taniborbactam MICs  $\leq 8$   $\mu\text{g/ml}$ , whereas 20 of 50 isolates (40.0%) with one of these specific variants were inhibited at 16  $\mu\text{g/ml}$  cefepime-taniborbactam (13.4% [20/149] of all isolates testing with a cefepime-taniborbactam MIC of 16  $\mu\text{g/ml}$ ) and the remaining 30 isolates at  $>16$   $\mu\text{g/ml}$  (25.4% [30/118] of all isolates tested with a cefepime-taniborbactam MIC of  $>16$   $\mu\text{g/ml}$ ).
